# Supplementary material for: Structure of the Rpn13-Rpn2 complex provides insights for Rpn13 and Uch37 as anticancer targets
Source: PubMed Central journal article supplement (PMC5494190; doi:10.1038/ncomms15540), 2017-06-09
Supplement: ncomms15540-s1.pdf [file ncomms15540-s1.pdf]

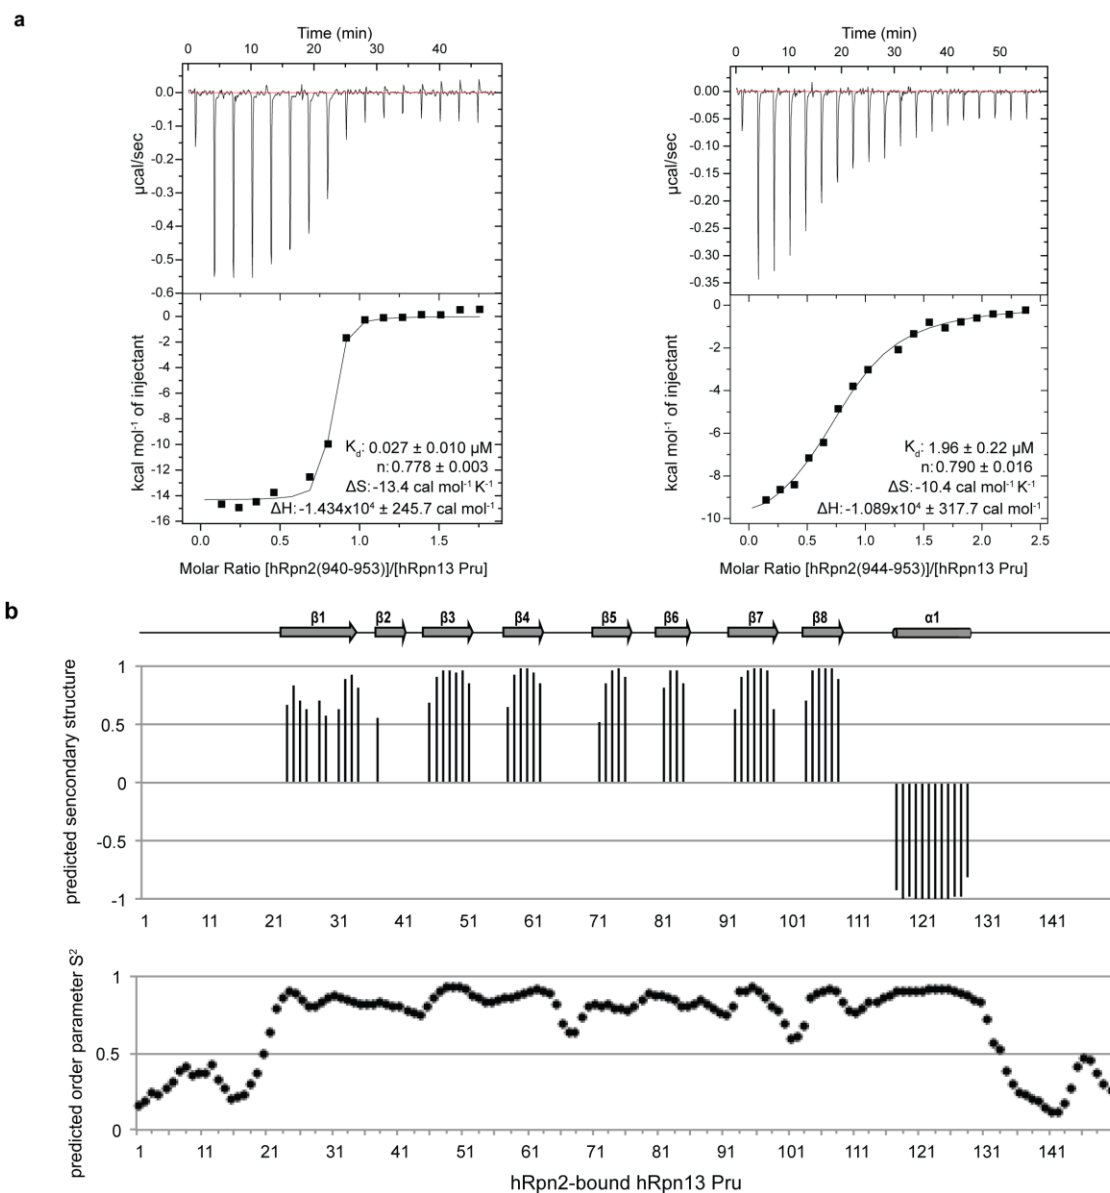

**Supplementary Figure 1: The C-terminal 14 amino acids of hRpn2 bind to hRpn13 Pru with 27 nM binding affinity.** (a) 200  $\mu\text{M}$  hRpn2 (940–953) or hRpn2 (944–953) was injected into a calorimeter cell containing 20 or 18  $\mu\text{M}$  hRpn13 Pru, respectively. The binding isotherms (top) were integrated to yield the change in enthalpy as a function of hRpn2 peptide addition. The data fit well to a 1-site binding mode with the indicated thermodynamic values. (b) Graphs of secondary structure (upper panel) and order parameter  $S^2$  (lower panel) for hRpn2-bound hRpn13 (1–150) calculated by TALOS+ (<http://spin.niddk.nih.gov/bax/software/TALOS/>) based on HN, C $\alpha$ , C $\beta$ , CO and N chemical shift assignments.



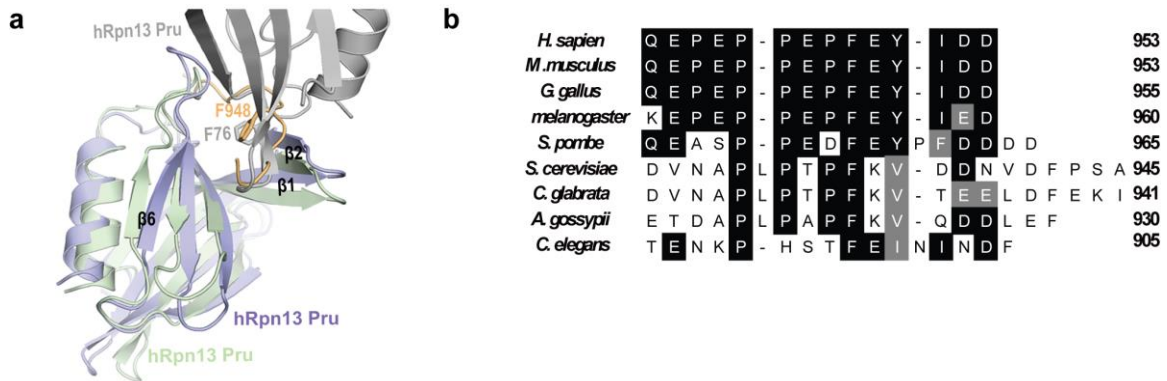

**Supplementary Figure 3: Comparison of hRpn13 Pru from a crystal structure and with hRpn2 bound.** (a) Overlay of hRpn13 Pru in its free crystal form (light green, PDB 5IRS) and the NMR structure of hRpn2-bound hRpn13 Pru (periwinkle blue). In the crystal another hRpn13 Pru molecule (shown in grey) packs F76 into the location of hRpn2 F948 (orange). (b) Sequence alignment across species for the C-terminal amino acids of Rpn2, generated by using Clustal Omega (<http://www.ebi.ac.uk/Tools/msa/clustab/>). Strictly and moderately conserved amino acids are shaded in black and grey respectively.

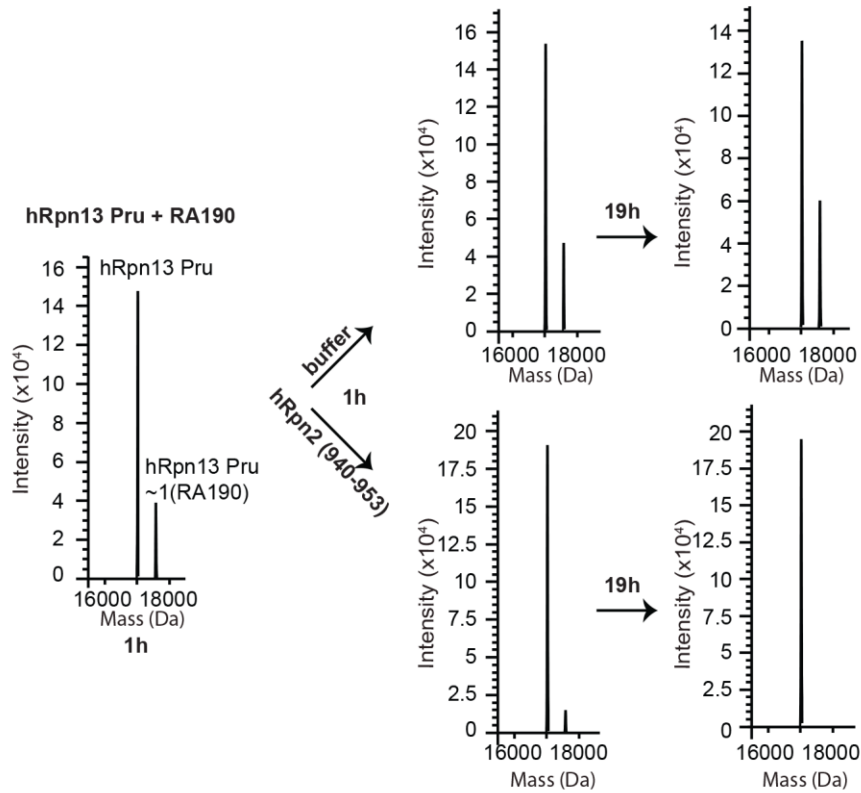

**Supplementary Figure 4: RA190 conjugation to hRpn13 Pru is labile.** 2  $\mu\text{M}$  hRpn13 Pru was incubated with 20  $\mu\text{M}$  RA190 for one hour and then subjected to LC-MS analysis. A parallel sample was then split and incubated for 1 or 19 hours with 10-fold molar excess hRpn2 (940-953) or equivalent volume of buffer for a final concentration of 2  $\mu\text{M}$  hRpn13 Pru and 20  $\mu\text{M}$  RA190 with or without 20  $\mu\text{M}$  hRpn2. The four samples were subjected to LC-MS analysis.

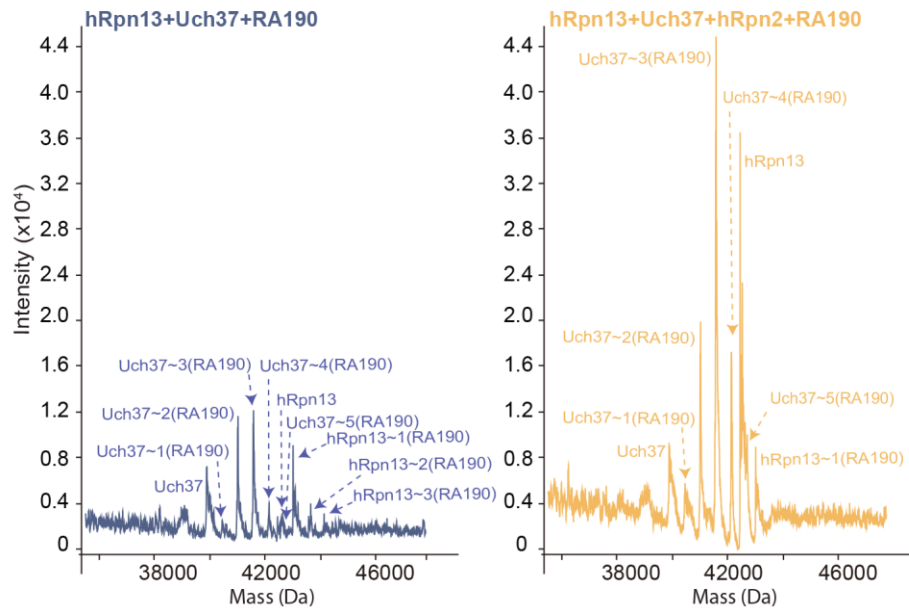

**Supplementary Figure 5: RA190 adducts to Uch37.** hRpn13 and Uch37 each at 2  $\mu$ M (blue) or also with equimolar hRpn2 (940-953) (orange) was incubated with 50  $\mu$ M RA190 for 2 hours and the samples loaded onto an Agilent 6520 Accurate-Mass Q-TOF LC/MS System. Analyses were performed by Mass Hunter Workstation (version B.06.01).

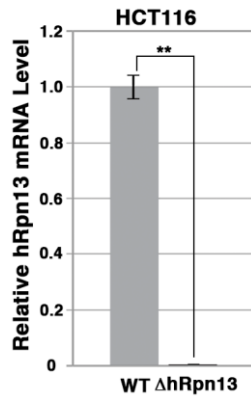

**Supplementary Figure 6: hRpn13 loss was confirmed by qPCR in hRpn13-deleted ( $\Delta$ hRpn13) HCT 116 cells.** Total RNA from WT or  $\Delta$ hRpn13 cells was purified and subjected to quantitative real-time PCR for hRpn13 mRNA analysis. GAPDH was used as an internal standard. Excel was used to quantify six independent experiments with the standard error of the mean (s.e.m.) shown. \*\*,  $p < 0.05$  as determined by a Student's *t*-test (two tails, two-sample equal variance).

1c

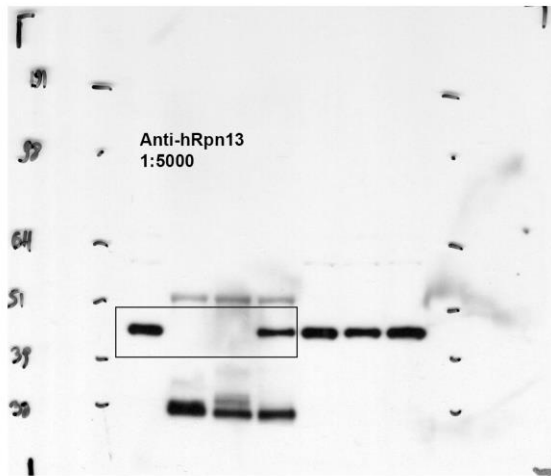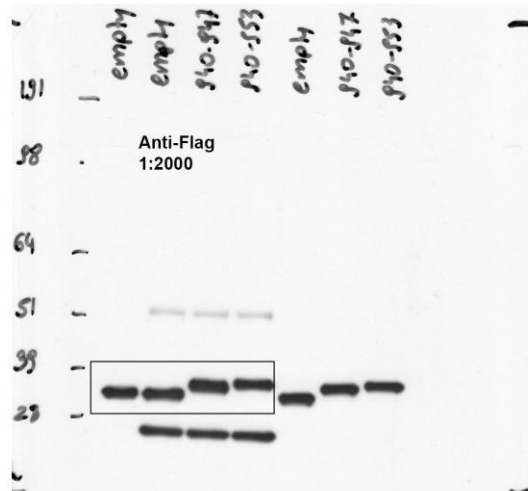

3g

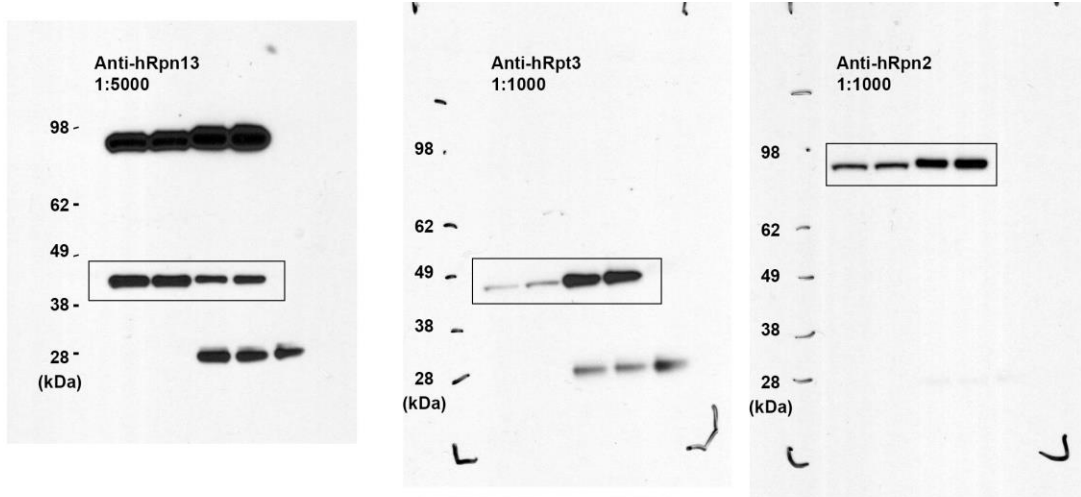

3h

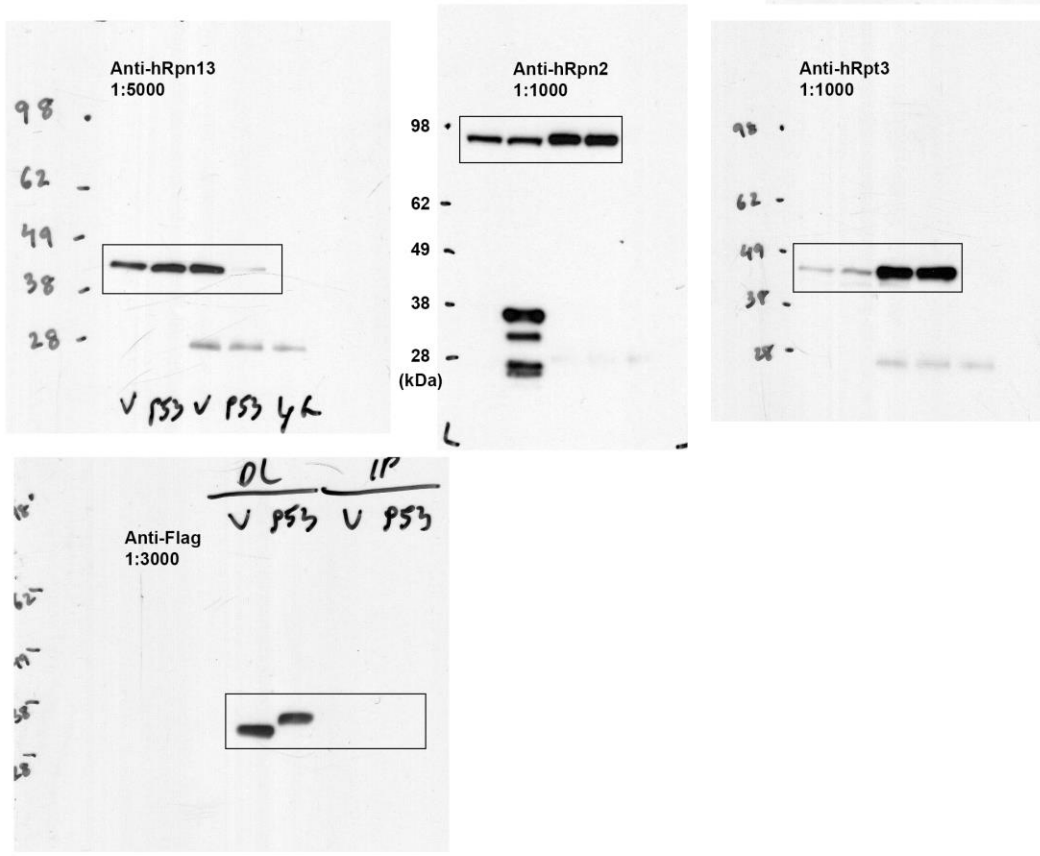



4a

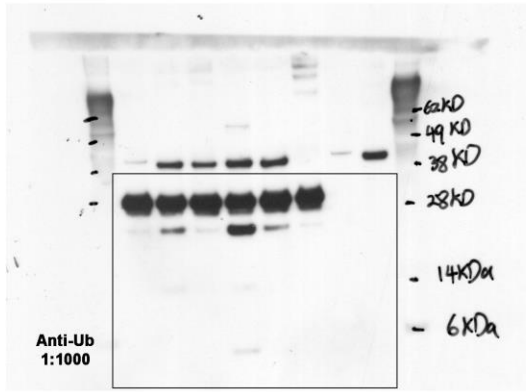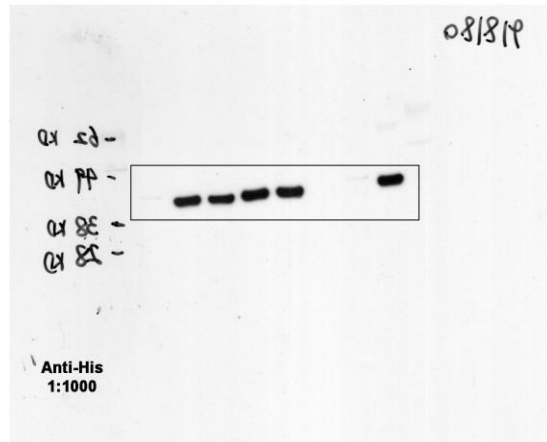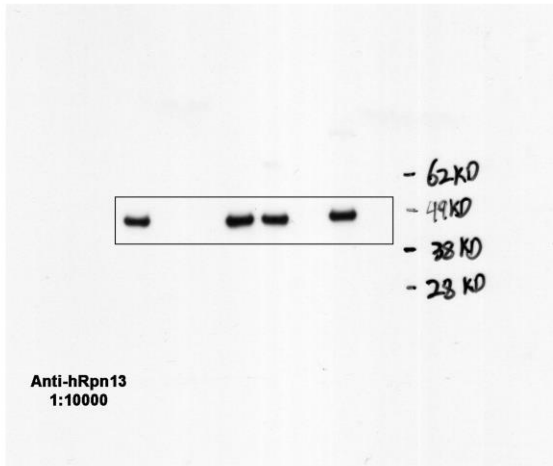

5a

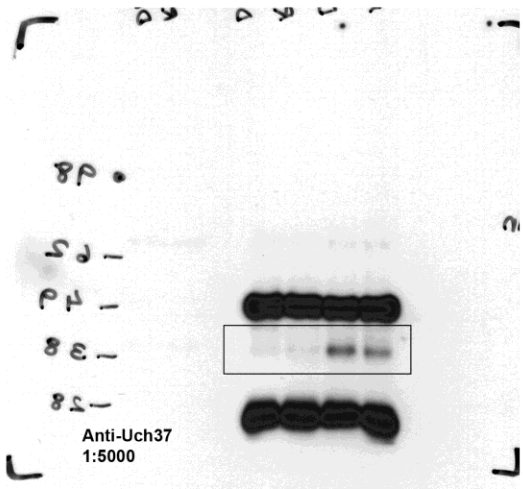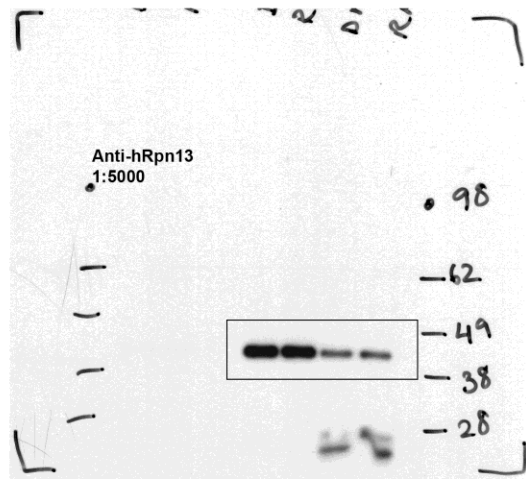

5b

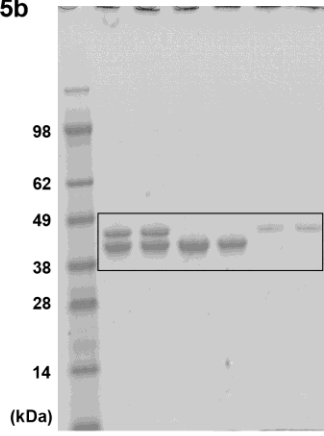

5c:hRpn13

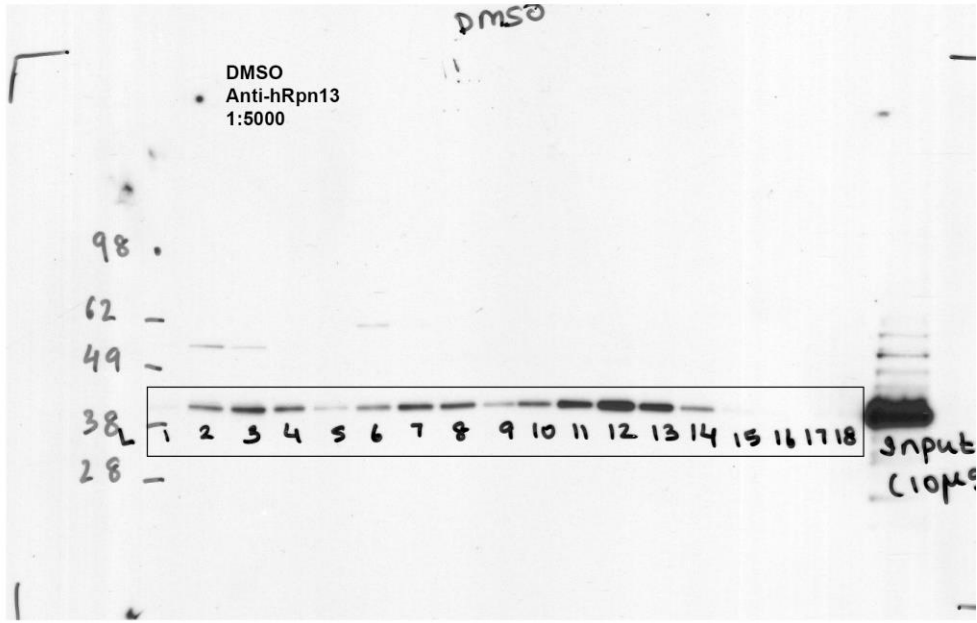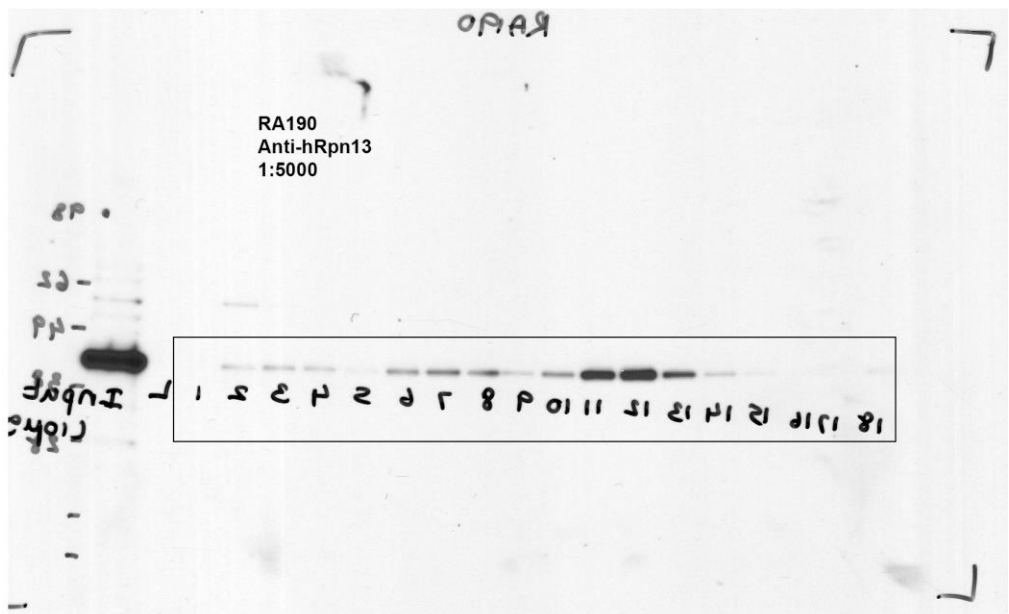

5c:Uch37

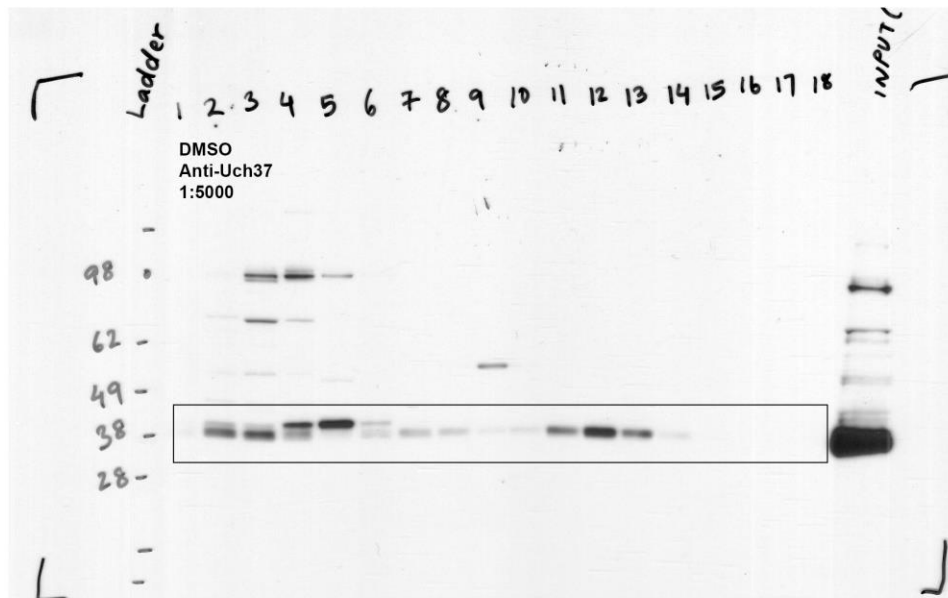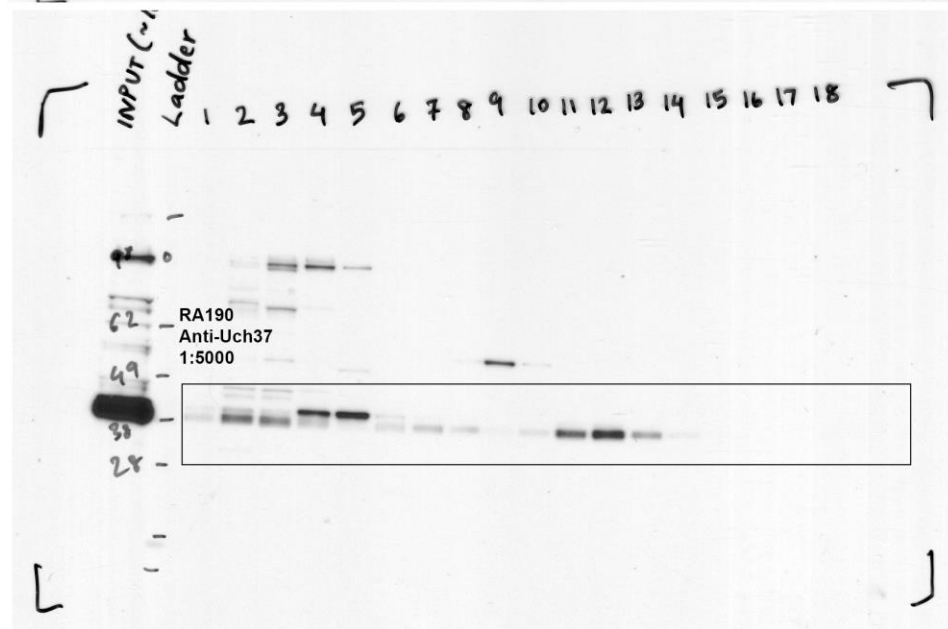

5c:β5

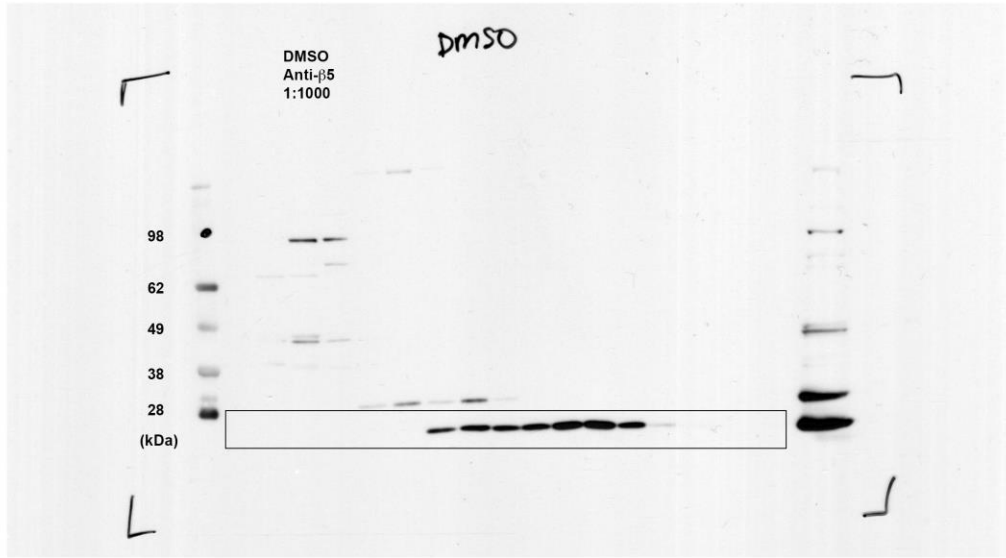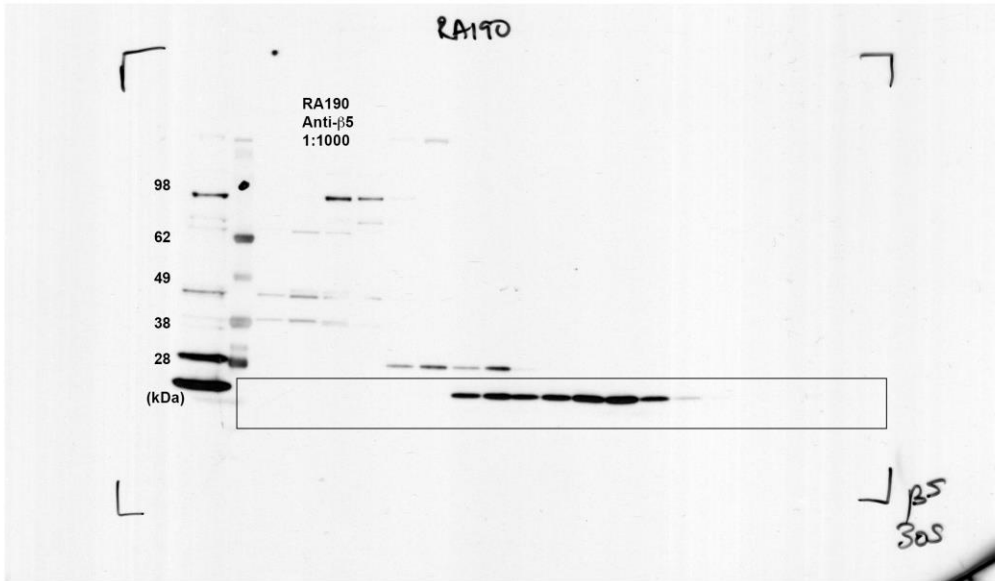

5c:INO80A

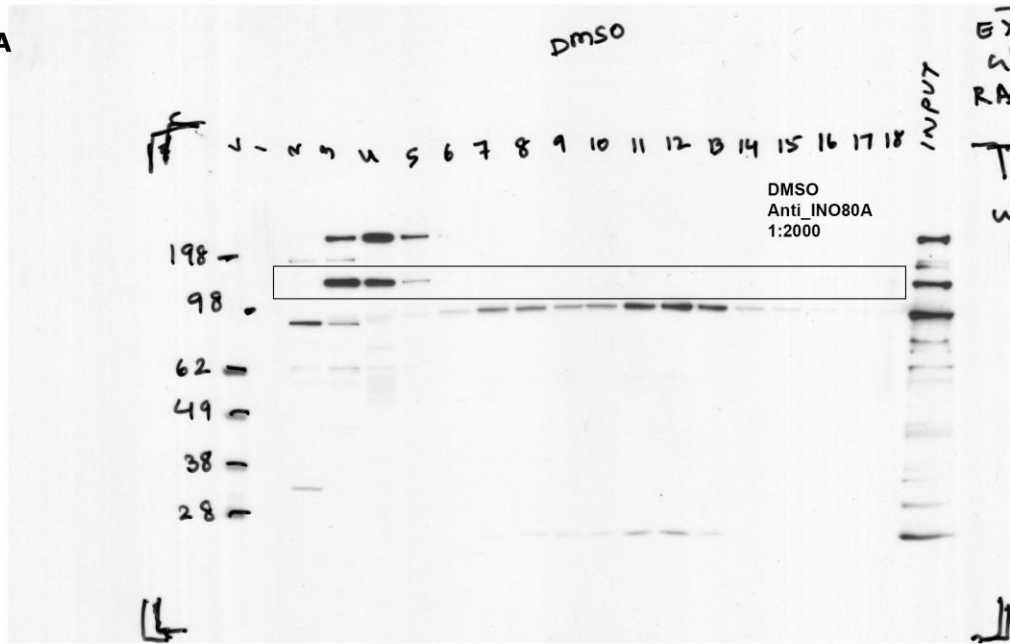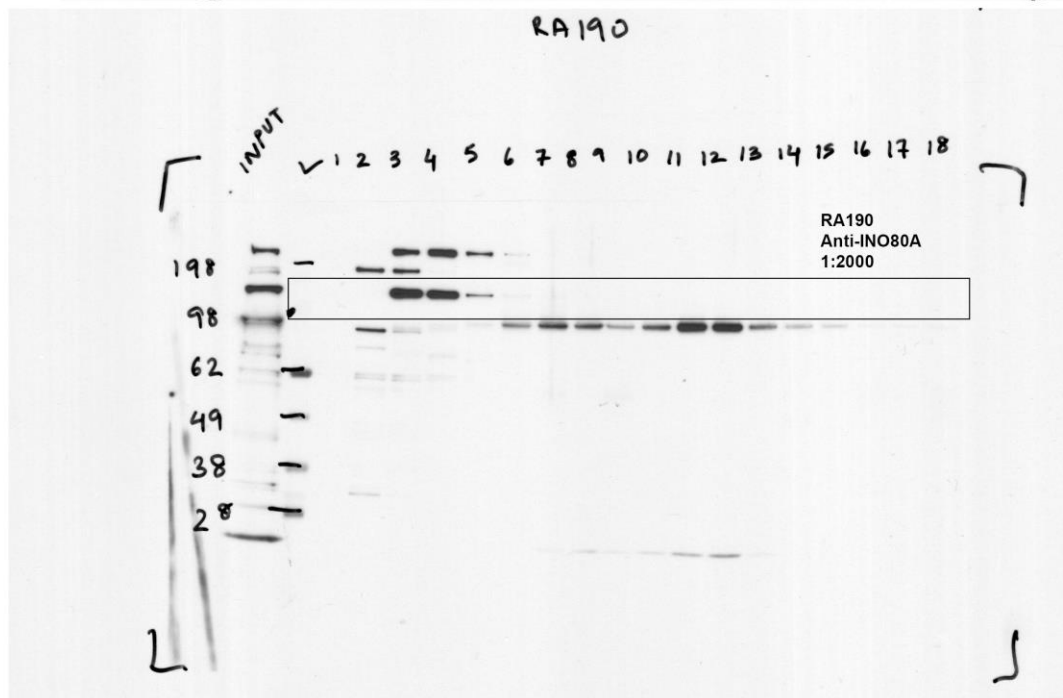

5c:β actin

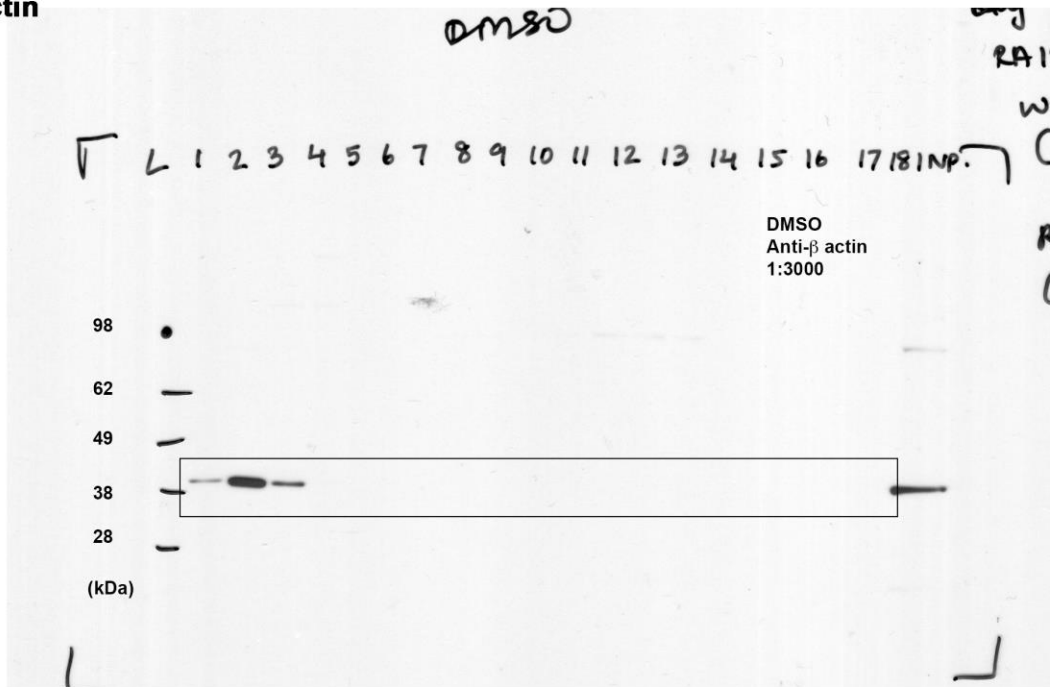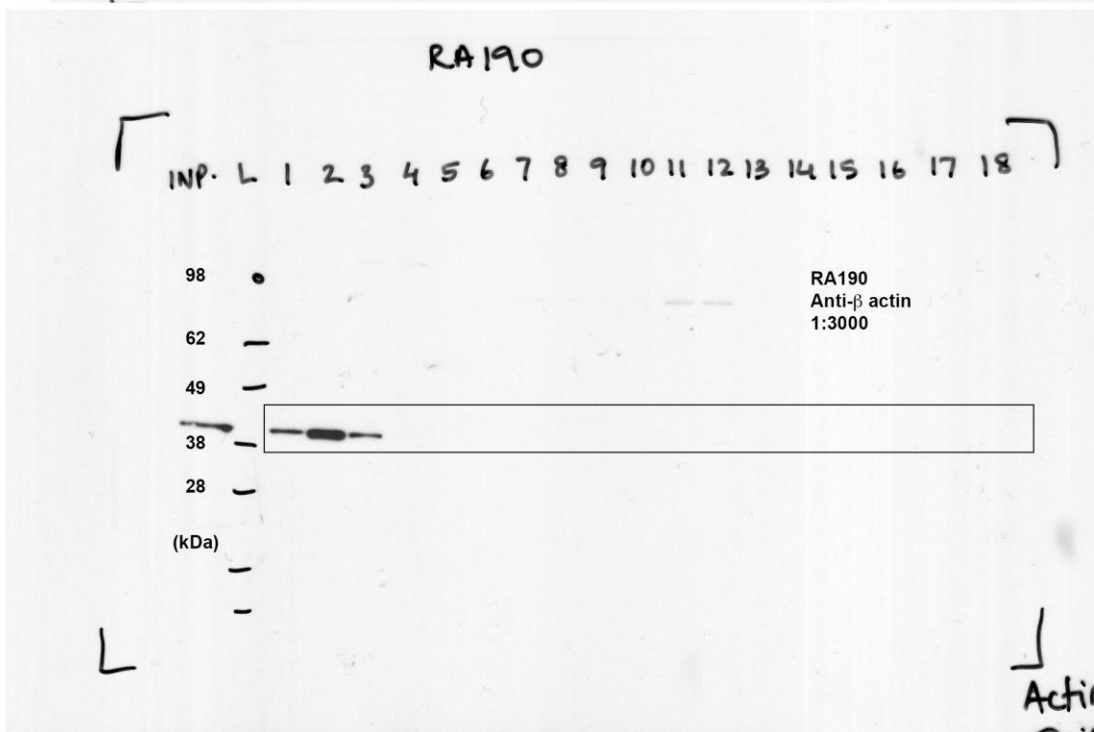

5d

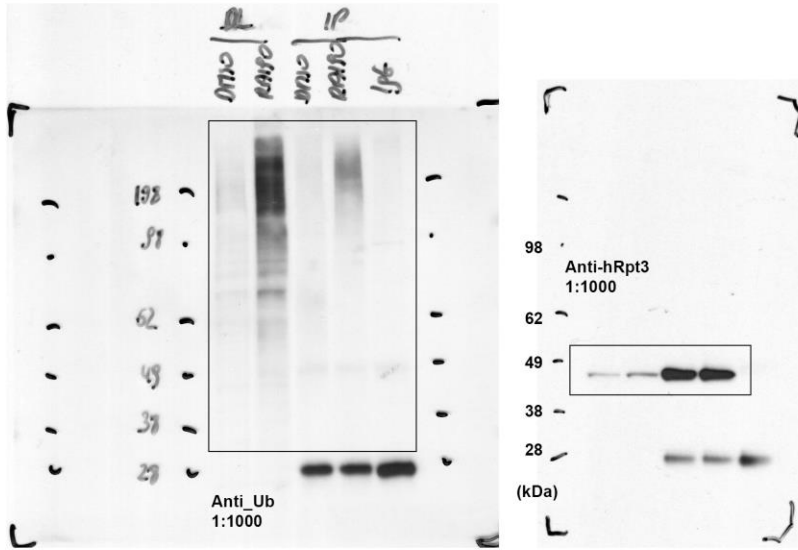

5e

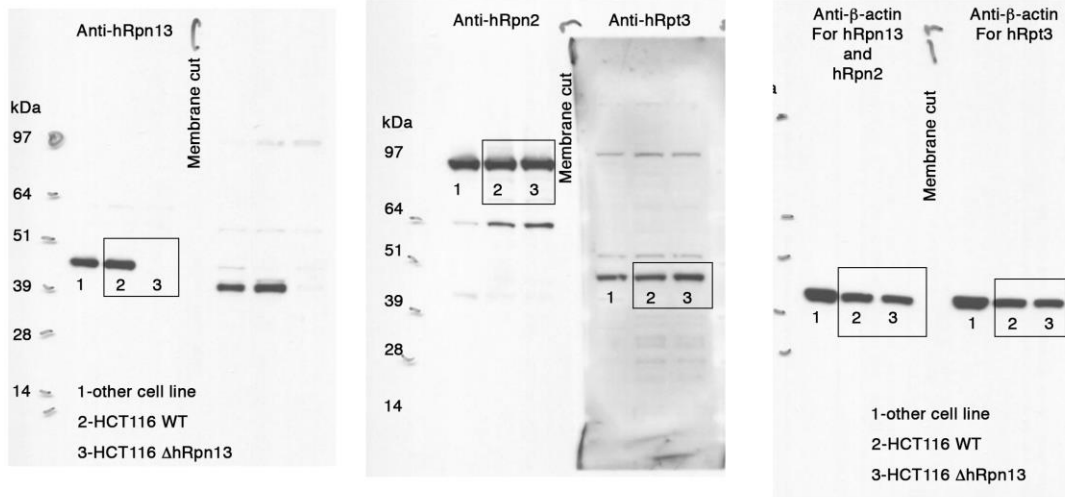



5f

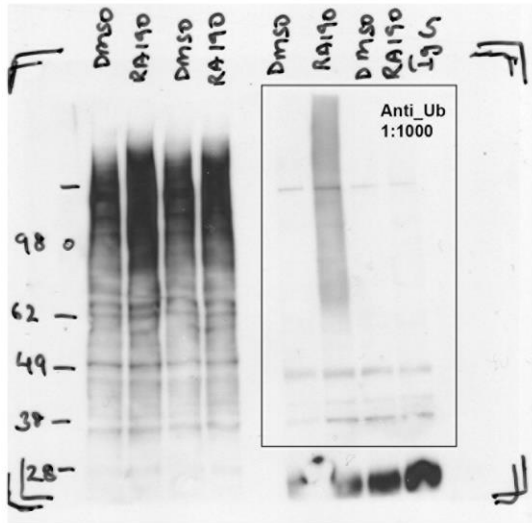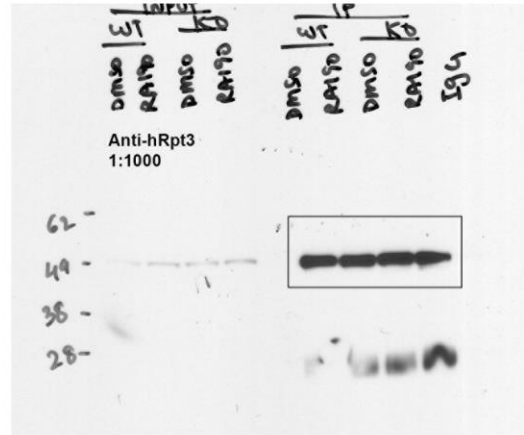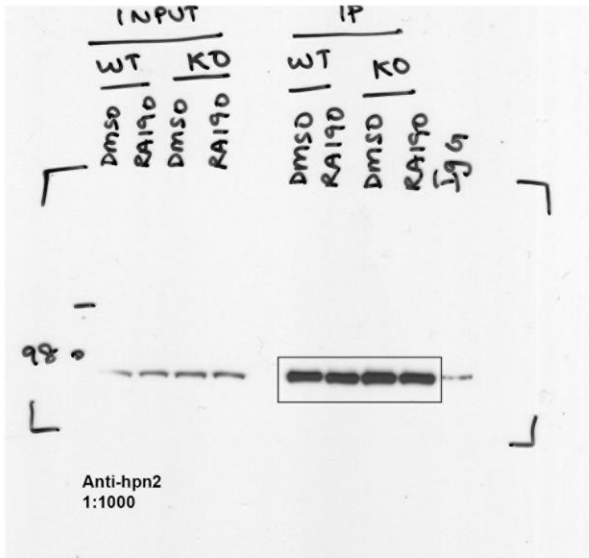

Supplementary Figure 7: uncropped images for figure 1c, 3g,h, 4a and 5a,b,c,d,e,f.

**Supplementary Table 1: Observed NOE interactions between the hRpn13 Pru domain and hRpn2.**

| <b>hRpn13 Pru</b>     | <b>hRpn2 (940-953)</b>                                                                                                                                                              |
|-----------------------|-------------------------------------------------------------------------------------------------------------------------------------------------------------------------------------|
| M31 (methyl)          | P947 (H $\alpha$ ) and F948 (H $\delta$ #, H $\epsilon$ #, H $\zeta$ )                                                                                                              |
| L33 (methyl)          | F948 (HN), E949 (HN, H $\alpha$ ) and Y950 (HN, H $\alpha$ , H $\beta$ #, H $\delta$ #, H $\epsilon$ #)                                                                             |
| T36 (H $\alpha$ )     | Y950 (H $\delta$ #), I951 (H $\alpha$ )                                                                                                                                             |
| T36 (H $\beta$ )      | E949 (H $\gamma$ #), I951 (H $\alpha$ , H $\delta$ 1#, H $\gamma$ 2#),                                                                                                              |
| T36 (methyl)          | E949 (H $\alpha$ , H $\gamma$ #), I951 (HN, H $\alpha$ , H $\delta$ 1#, H $\gamma$ 1#, H $\gamma$ 2#), Y950 (HN, H $\alpha$ , H $\beta$ #, H $\delta$ #, H $\epsilon$ #), D952 (HN) |
| T37 (H $\alpha$ )     | F948 (HN), E949 (HN, H $\alpha$ , H $\beta$ #, H $\gamma$ #), Y950 (HN)                                                                                                             |
| T37 (H $\beta$ )      | F948 (HN), E949 (H $\alpha$ )                                                                                                                                                       |
| T37 (methyl)          | P947 (H $\alpha$ , H $\beta$ #, H $\gamma$ #), F948 (HN), E949 (HN, H $\alpha$ , H $\gamma$ #)                                                                                      |
| V38 (HN)              | F948 (HN), E949 (HN, H $\alpha$ ), Y950 (HN)                                                                                                                                        |
| V38 (H $\beta$ )      | F948 (HN, H $\delta$ #, H $\epsilon$ #, H $\zeta$ ), E949 (HN), Y950 (HN)                                                                                                           |
| V38 (methyl)          | F948 (HN, H $\delta$ #, H $\epsilon$ #, H $\zeta$ ), E949 (HN, H $\alpha$ ), Y950 (HN, H $\alpha$ , H $\beta$ #, H $\delta$ #, H $\epsilon$ #)                                      |
| T39 (H $\alpha$ )     | E946 (HN), P947 (H $\alpha$ , H $\beta$ #, H $\gamma$ #)                                                                                                                            |
| T39 (H $\beta$ )      | E946 (HN), P947 (H $\alpha$ , H $\beta$ #, H $\gamma$ #)                                                                                                                            |
| T39 (methyl)          | E946 (H $\alpha$ ), P947 (H $\alpha$ , H $\beta$ #, H $\gamma$ #, H $\delta$ #), F948 (HN)                                                                                          |
| P40 (H $\beta$ #)     | P945 (H $\gamma$ #)                                                                                                                                                                 |
| P40 (H $\delta$ #)    | P945 (H $\gamma$ #, H $\delta$ #), P947 (H $\alpha$ , H $\beta$ #, H $\gamma$ #)                                                                                                    |
| V85 (H $\beta$ )      | F948 (H $\epsilon$ #, H $\zeta$ )                                                                                                                                                   |
| V85 (methyl)          | F948 (H $\delta$ #, H $\epsilon$ #, H $\zeta$ ), Y950 (H $\delta$ #, H $\epsilon$ #)                                                                                                |
| V93 (methyl)          | F948 (H $\delta$ #, H $\epsilon$ #, H $\zeta$ )                                                                                                                                     |
| V95 (methyl)          | Y950 (H $\delta$ #, H $\epsilon$ #)                                                                                                                                                 |
| R104 (H $\gamma$ #)   | Y950 (H $\epsilon$ #)                                                                                                                                                               |
| R104 (H $\delta$ #)   | Y950 (H $\epsilon$ #)                                                                                                                                                               |
| W108 (H $\zeta$ 2)    | P944 (H $\gamma$ #), P945 (H $\gamma$ #)                                                                                                                                            |
| W108 (H $\zeta$ 3)    | E943 (HN, H $\alpha$ ), P944 (H $\gamma$ #, H $\delta$ #), P945 (H $\delta$ #)                                                                                                      |
| W108 (H $\epsilon$ 3) | P945 (H $\delta$ #)                                                                                                                                                                 |
| W108 (H $\eta$ 2)     | P944 (H $\beta$ #, H $\gamma$ #, H $\delta$ #), E943 (HN)                                                                                                                           |
| E110 (H $\alpha$ )    | P942 (H $\alpha$ , H $\beta$ #, H $\gamma$ #)                                                                                                                                       |
| P112 (H $\alpha$ )    | P942 (H $\alpha$ , H $\beta$ #, H $\gamma$ #, H $\delta$ #)                                                                                                                         |
| P112 (H $\gamma$ #)   | P942 (H $\beta$ #)                                                                                                                                                                  |

#: pseudo atoms lacking stereo assignment

**Supplementary Table 2: LC-MS data for mixtures of hRpn13, hRpn2, and RA190.**

| Sample       | hRpn13 species |          |          |          |
|--------------|----------------|----------|----------|----------|
|              | Free           | 1(RA190) | 2(RA190) | 3(RA190) |
| Pru          | 17017.49       | 17577.89 | 18138.15 | ND       |
| Pru+hRpn2    | 17017.50       | ND       | ND       | ND       |
| DEUBAD       | 16323.12       | 16881.97 | ND       | ND       |
| hRpn13       | 42450.64       | 43012.33 | 43572.64 | 44134.00 |
| hRpn13+hRpn2 | 42451.88       | 43012.66 | ND       | ND       |

ND = not detected

Table listing the molecular weight and indicated species from LC-MS analyses of listed samples. 2  $\mu$ M free protein or equimolar mixture was incubated with 10-fold molar excess RA190 for 2 hours at 4 °C and the samples subjected to LC-MS. The molecular weight of RA190 is 560.30 Da and the species indicated are based on calculated molecular weight. Molecular weight was calculated by OpenLAB CDS ChemStation Edition C.01.05 or Mass Hunter Workstation (version B.06.01). ND, not detected. 1(RA190), hRpn13 with one RA190 molecule adducted; 2(RA190), hRpn13 with two RA190 molecules adducted; 3(RA190), hRpn13 with three RA190 molecules adducted.

**Supplementary Table 3: LC-MS data for mixtures of Uch37, hRpn13, hRpn2, and RA190.**

| Species         | Sample   |              |                    |
|-----------------|----------|--------------|--------------------|
|                 | Uch37    | hRpn13+Uch37 | hRpn13+Uch37+hRpn2 |
| Uch37           | 39906.16 | 39903.53     | 39905.29           |
| Uch37~1(RA190)  | 40452.51 | 40453.00     | 40453.00           |
| Uch37~2(RA190)  | 41022.61 | 41025.84     | 41024.85           |
| Uch37~3(RA190)  | 41583.98 | 41586.44     | 41585.38           |
| Uch37~4(RA190)  | 42146.80 | 42143.98     | 42133.95           |
| Uch37~5(RA190)  | 42707.82 | 42705.00     | 42707.70           |
| hRpn13          | NA       | 42450.49     | 42452.39           |
| hRpn13~1(RA190) | NA       | 43013.32     | 43013.43           |
| hRpn13~2(RA190) | NA       | 43572.10     | ND                 |
| hRpn13~3(RA190) | NA       | 44132.39     | ND                 |

NA = not applicable; ND = not detected

Table listing the molecular weight and indicated species from LC-MS analyses of listed samples. 2  $\mu$ M Uch37, equimolar mixture of 2  $\mu$ M hRpn13 and Uch37, or equimolar mixture of 2  $\mu$ M hRpn13, Uch37, and hRpn2 was incubated with 25-fold molar excess RA190 for 2 hours at 4 °C and then subjected to LC-MS. Molecular weight for indicated species were calculated by Mass Hunter Workstation (version B.06.01) (NA, not applicable; ND, not detected). 1(RA190), hRpn13 or Uch37 with one RA190 molecule adducted; 2(RA190), hRpn13 or Uch37 with two RA190 molecules adducted; 3(RA190), hRpn13 or Uch37 with three RA190 molecules adducted; 4(RA190), Uch37 with four RA190 molecules adducted; 5(RA190), Uch37 with five RA190 molecules adducted.

**Supplementary Table 4: Oligonucleotides for sgRNA targeting the *ADRM1* gene.**

|         |           | Primer Sequences (5' to 3') | Obtained clones |
|---------|-----------|-----------------------------|-----------------|
| sgRNA-B | sense     | AAACTGCGATTCCGGTAGGAACTTC   | B11             |
|         | antisense | CACCGAAGTTCCTAACCGAATCGCA   |                 |
| sgRNA-C | sense     | AAACATTGCGGTGTGAAATTTCCAC   | C8, C9          |
|         | antisense | CACCGTGGAAATTTCAACCGCAAT    |                 |
